# Supplementary material for: CRISPR-Cas9 Mediated Gene-Silencing of the Mutant Huntingtin Gene in an In Vitro Model of Huntington’s Disease
Source: MDPI journal article supplement (doi:10.3390/ijms18040754), 2017-04-02
Supplement: s1 [file s1]

## Supplementary material

**Table S1: Potential off-target effects with gRNA1.**

| sequence                | mismatches      | UCSC gene | locus            | Location |
|-------------------------|-----------------|-----------|------------------|----------|
| GCAAGGCTGTCCCCGGAGGCGGG | 2MMs [4:8]      |           | chr19:+2215587   | Intron   |
| GCACGCCAGGCCCGGAGGCGGG  | 2MMs [6:10]     | NM_006039 | chr17:-60758088  | Exon     |
| GCCAGGCAGGCCCGGAGGCAGG  | 3MMs [3:4:10]   |           | chr22:-47431106  | Intron   |
| ACACGGCAGTCCCAGGAGGCTGG | 2MMs [1:14]     |           | chr1:-1557524    | Intron   |
| TCCCGTCAGTCCCCGGAGGCCAG | 3MMs [1:3:6]    | NM_133475 | chr19:+4212461   | Exon     |
| GCGCGGCGGTGCCCGGAGGCTGG | 3MMs [3:8:11]   |           | chr5:-176245036  | Intron   |
| GGACGGCACTCCCCGGAGGTAAG | 3MMs [2:9:20]   | NM_015073 | chr19:+38621393  | Exon     |
| GCCTGGCAGTCCCTGAGGCTGG  | 3MMs [3:4:15]   |           | chr22:-39924296  | Intron   |
| GGACGGAAGTCCCCAGAGGCTAG | 3MMs [2:7:15]   |           | chr2:-233227947  | Intron   |
| GCACGTGAGTCTCCGGAGGCCGG | 3MMs [6:7:12]   |           | chr9:+140209299  | Intron   |
| ACCCGGCAGTCCCAGGAGGCCAG | 3MMs [1:3:14]   |           | chr1:-6324894    | Intron   |
| GCACGGCCCTCCCCAGAGGCCAG | 3MMs [8:9:15]   |           | chr13:-114444313 | Intron   |
| GCACGCCAGGCCCGGAGGCTGG  | 3MMs [6:10:15]  |           | chr5:-62015504   | Intron   |
| GCACGGCAGCCTCCGGAGCCAGG | 3MMs [10:12:19] | NM_023068 | chr20:+3673382   | Exon     |
| GCCCGGCAGGCCAGGAGGCGGG  | 3MMs [3:10:14]  | NM_170600 | chr9:-130536477  | Exon     |
| GCAGGGCAGTCCCCCGAGGGCAG | 3MMs [4:15:20]  |           | chr11:+2792144   | Intron   |

**Table S2: Potential off-target effects with gRNA2.**

| sequence                 | mismatches         | UCSC gene | locus           | Location |
|--------------------------|--------------------|-----------|-----------------|----------|
| GAGGGGCGGGGACACGAACGAGG  | 4MMs [2:6:10:20]   | NM_031461 | chr8:-75896816  | Exon     |
| CAGGCCCCGGCGACACCAACCTGG | 4MMs [1:2:5:16]    |           | chr6:+34051008  | Intron   |
| GAGGCACGGCGACAAGAACCCAG  | 4MMs [2:5:6:15]    |           | chr22:-40644222 | Intron   |
| CGGGGCCGGCCACAAGAACCCAG  | 4MMs [1:2:11:15]   |           | chr8:-61948047  | Intron   |
| GAGGGCAGGCCACACGCACCGGG  | 4MMs [2:7:11:17]   | NM_005560 | chr20:+60888362 | Exon     |
| GCGAGGCGGCCACACGCACCGAG  | 4MMs [4:6:11:17]   | NM_004530 | chr16:+55513325 | Exon     |
| GCAGGCCGGTGGCAGGAACCAGG  | 4MMs [3:10:12:15]  | NM_198456 | chrX:+54208976  | Exon     |
| GCGGGCCCTCGCCACGCACCCGG  | 4MMs [8:9:12:17]   | NM_001520 | chr16:-27561041 | Exon     |
| CAGGGCCGGCGCCACGACCCGGG  | 4MMs [1:2:12:18]   |           | chr1:+159894869 | Intron   |
| CCGGGCCGGCGGGACGAACGCAG  | 4MMs [1:12:13:20]  | NM_145239 | chr16:-29827222 | Exon     |
| GCGGGGCAGGGACCCGAACCGGG  | 4MMs [6:8:10:14]   |           | chr1:+15481403  | Intron   |
| GCAGGCCGGAGACACGTCCCCGG  | 4MMs [3:10:17:18]  |           | chr1:-32403475  | Intron   |
| GCGGGCCAGCACCAAGGAACCAGG | 4MMs [8:11:12:15]  | NR_027138 | chr11:+3239526  | Exon     |
| GCGGGCGGGGACAGGAAGCGGG   | 4MMs [7:10:15:19]  |           | chr7:+1708958   | Intron   |
| GCAGGCCAGCGACTCGAAACCGG  | 4MMs [3:8:14:19]   | NM_000465 | chr2:+215674364 | Exon     |
| GCTGGCCGGCGACAGGGACAAAG  | 4MMs [3:15:17:20]  |           | chr5:+176293908 | Intron   |
| GCGGGGCGGGGACAAACCAAG    | 4MMs [6:10:12:16]  |           | chr13:+28577006 | Intron   |
| GCTGCCCCGGCGACACAAGCCAG  | 4MMs [3:5:16:18]   |           | chr8:-33267921  | Intron   |
| GCGGGCCGGGTCTCTGAACCTGG  | 4MMs [10:11:12:14] |           | chr15:-51386361 | Intron   |
| GCGGGCCTGCGGCCCGGACCCGG  | 4MMs [8:12:14:17]  | NM_015641 | chr7:-115850567 | Exon     |
| GGGGGCCGGCGACAAAAGGCGG   | 4MMs [2:16:19:20]  |           | chr17:+60555802 | Intron   |
| GCGGGCTGGCGGCACTCACCCAG  | 4MMs [7:12:16:17]  |           | chr8:+7923764   | Intron   |
| GCGGGCGGGCGCCGCAACATGG   | 4MMs [7:12:14:20]  |           | chr7:-30028806  | Intron   |

| sequence                | mismatches         | UCSC gene | locus           | Location |
|-------------------------|--------------------|-----------|-----------------|----------|
| GCGGCCCGGCGACAGGTCCGGG  | 4MMs [5:15:17:18]  |           | chr15:-75494939 | Intron   |
| GCGGGCGGGCCACAAGAGCCGGG | 4MMs [7:11:15:18]  |           | chr5:+142783709 | Intron   |
| GCGGGCCGCCGTCACCATCCAGG | 4MMs [9:12:16:18]  | NM_004145 | chr19:+17303681 | Exon     |
| GCGGGCCGGCGCCGCGGAGCGAG | 4MMs [12:14:17:19] | NR_034172 | chr17:+44271185 | Exon     |
| GCGGGCCGCCACCGGAAGCGGG  | 4MMs [9:14:15:19]  | NR_039924 | chrX:+7065829   | Exon     |
| GCGGGGCGGCGACGCGGGCCCGG | 4MMs [6:14:17:18]  | NM_030786 | chr1:+33168173  | Exon     |

## Supplemental figures

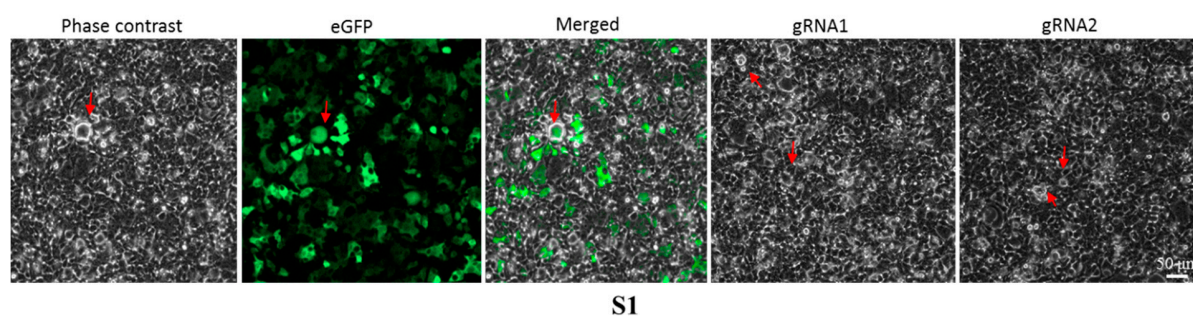

**Figure S1: Morphological changes in 293FT cells after 24 h post-transfection.** The 293FT cells were grown in DMEM and transfected with PAX2, VSVG with either eGFP or gRNA1 or gRNA2 using lipofectamine-3000. Note that the 293FT cells showing ‘balloon-like’ morphology (highlighted with red arrow) 24 h post-transfection indicate successful production of lenti-virus. Scale bar is 50 μm and is applicable to all the images.

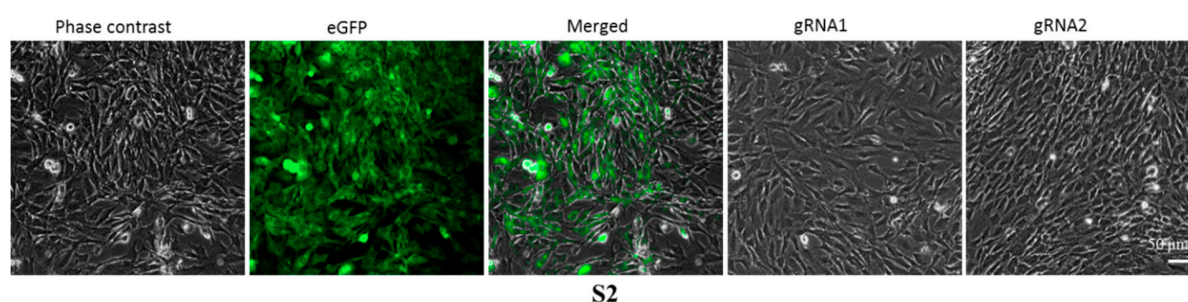

**Figure S2: Puromycin selected BM-MSCs.** BM-MSCs were cultured in MEM-α and infected with lenti-eGFP or lenti-CRISPR gRNA1 or lenti-CRISPR-gRNA2. Resistance and the survival of infected BM-MSC cultures to puromycin exposure after 15 days post-infection were observed. Scale bar is 50 μm and is applicable to all images.

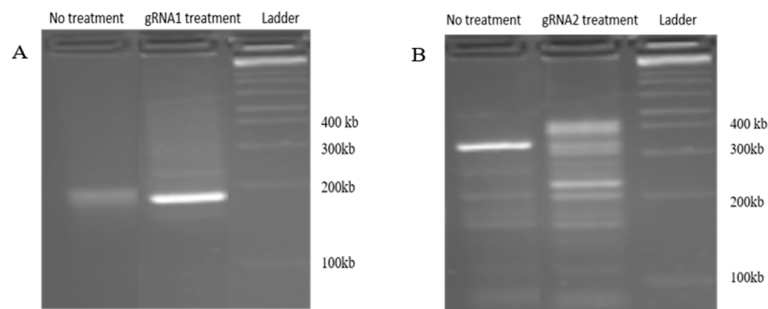

**Figure S3: Amplification of the region around the double strand break (DSB).** This figure shows the amplified region around the DSB, from the YAC128 BM-MSCs before and after treatment with lenti-CRISPR-gRNA1 (A) and lenti-CRISPR-gRNA2 (B). The product size expected for A is 179 kb, and B is 339 kb.
